# Supplementary material for: Identification and characterization of the Indian Yellow dyestuff and its degradation products in historical oil paint tube by liquid chromatography mass spectrometry
Source: Royal Society of Chemistry journal article supplement (doi:10.1039/c5ra06781b), 2015-01-01
Supplement: c5ra06781b1.pdf [file c5ra06781b1.pdf]

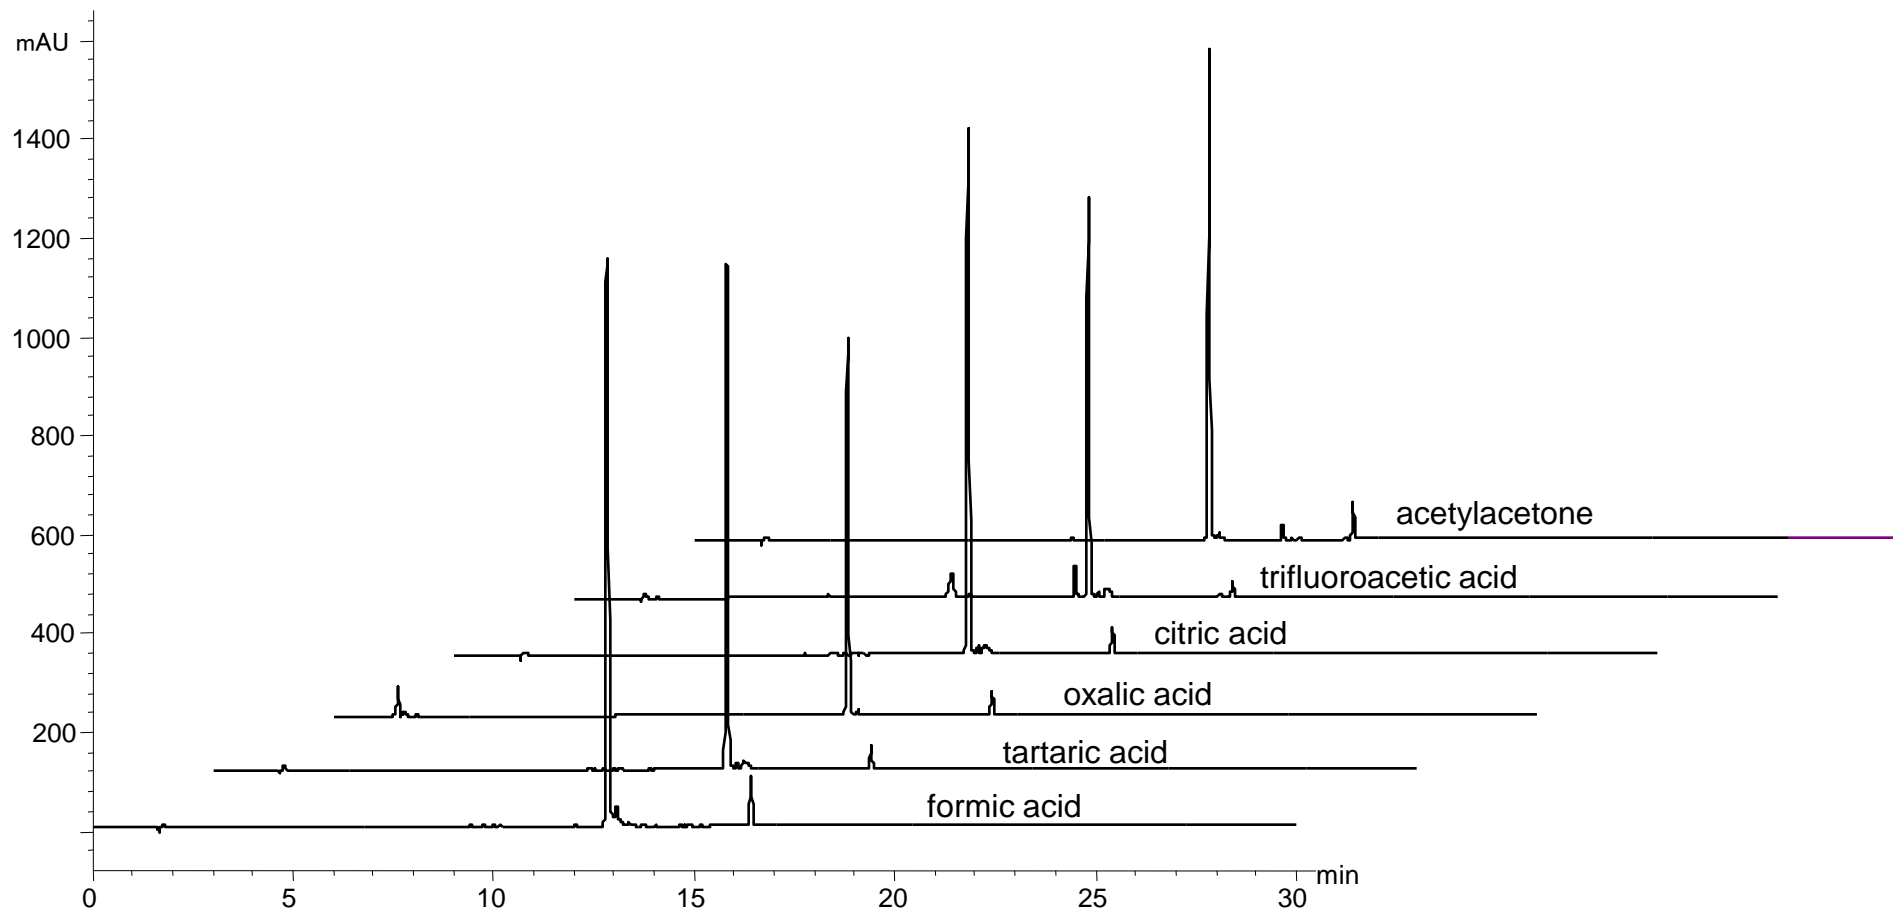

### Supp. 1.

Chromatograms of extracts of yellow dyestuff taken from paint tube of Jan Matejko by using: A) formic acid, B) tartaric acid, C) oxalic acid, D) citric acid E) TFA, G) acetylacetone extraction methods. For chromatographic conditions see Table1.

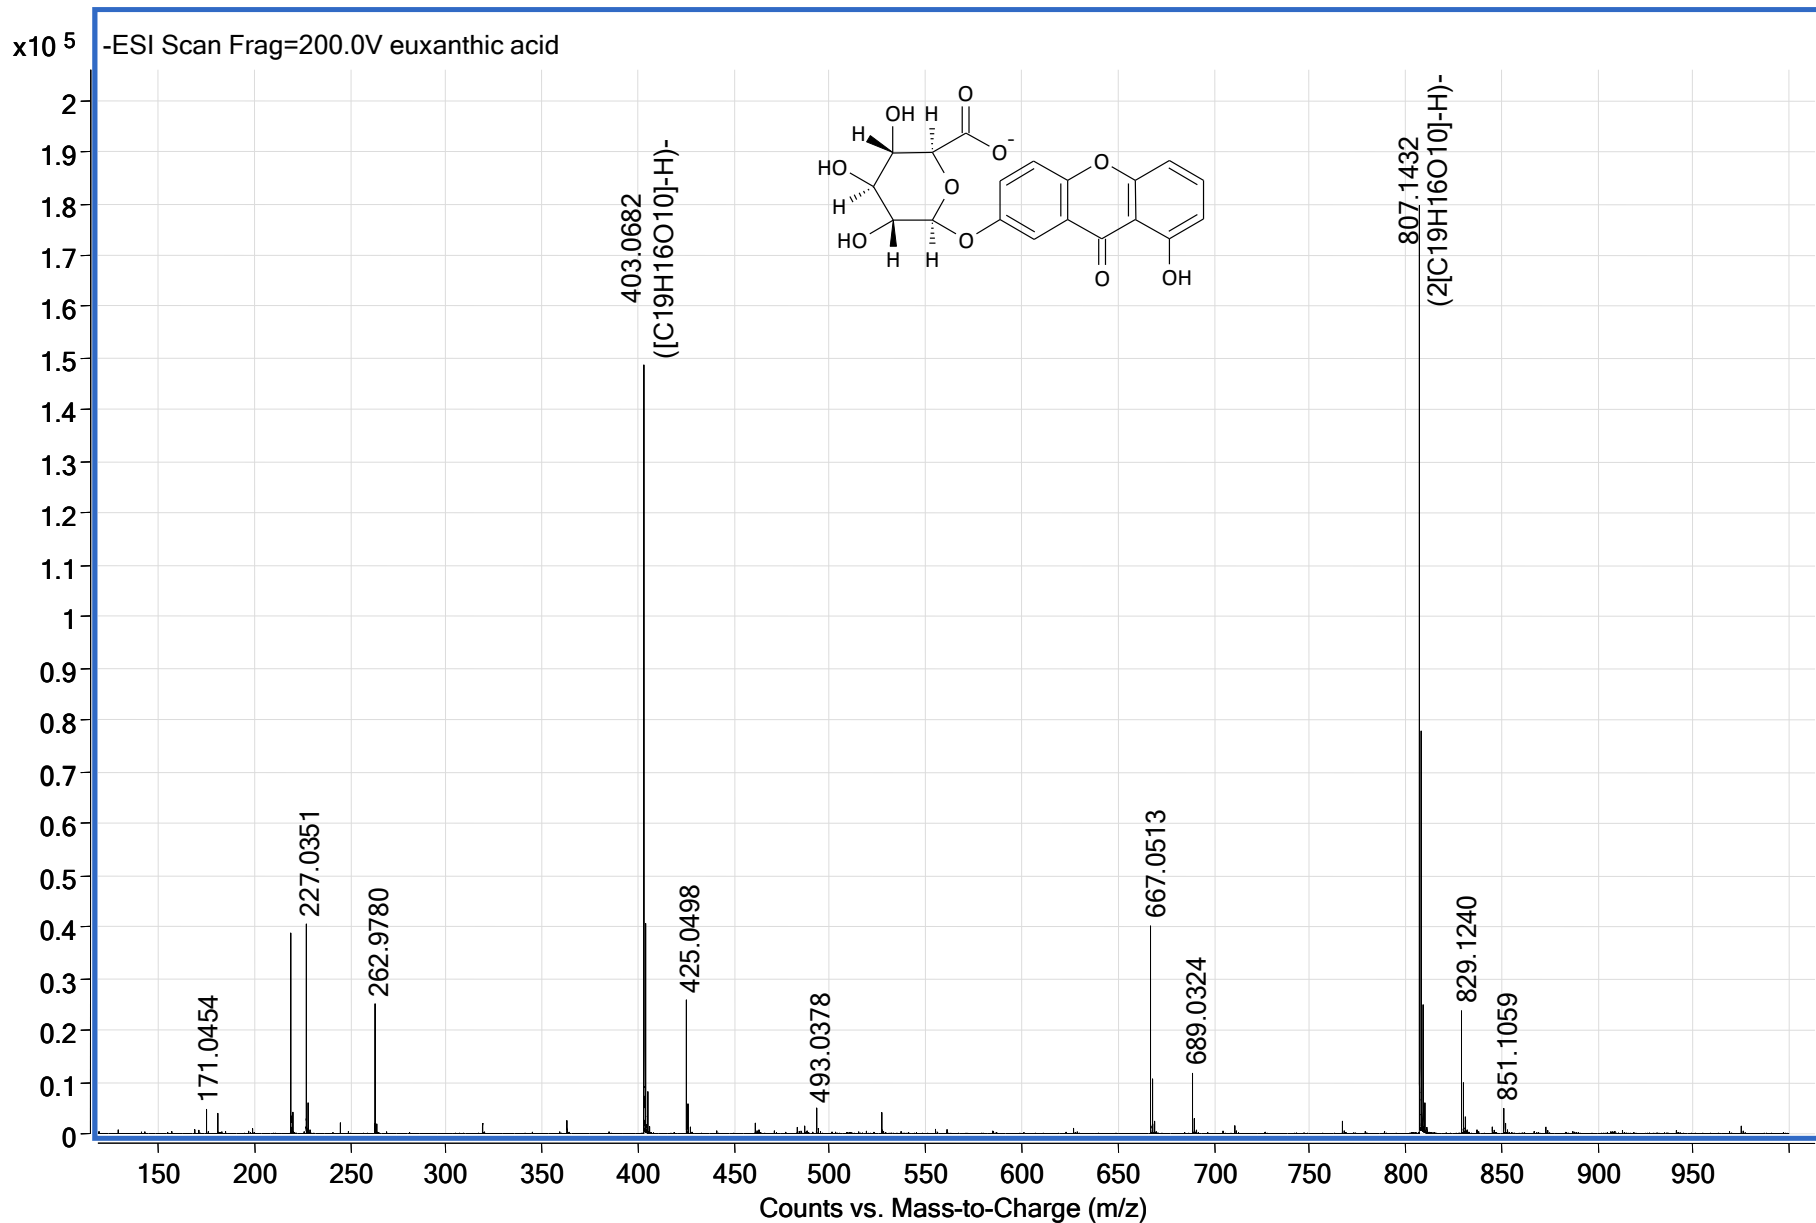

**Supp. 2.** Mass spectra of euxanthic acid

-ESI Scan Frag=200.0V methyl euxanthonate\_HCl extract

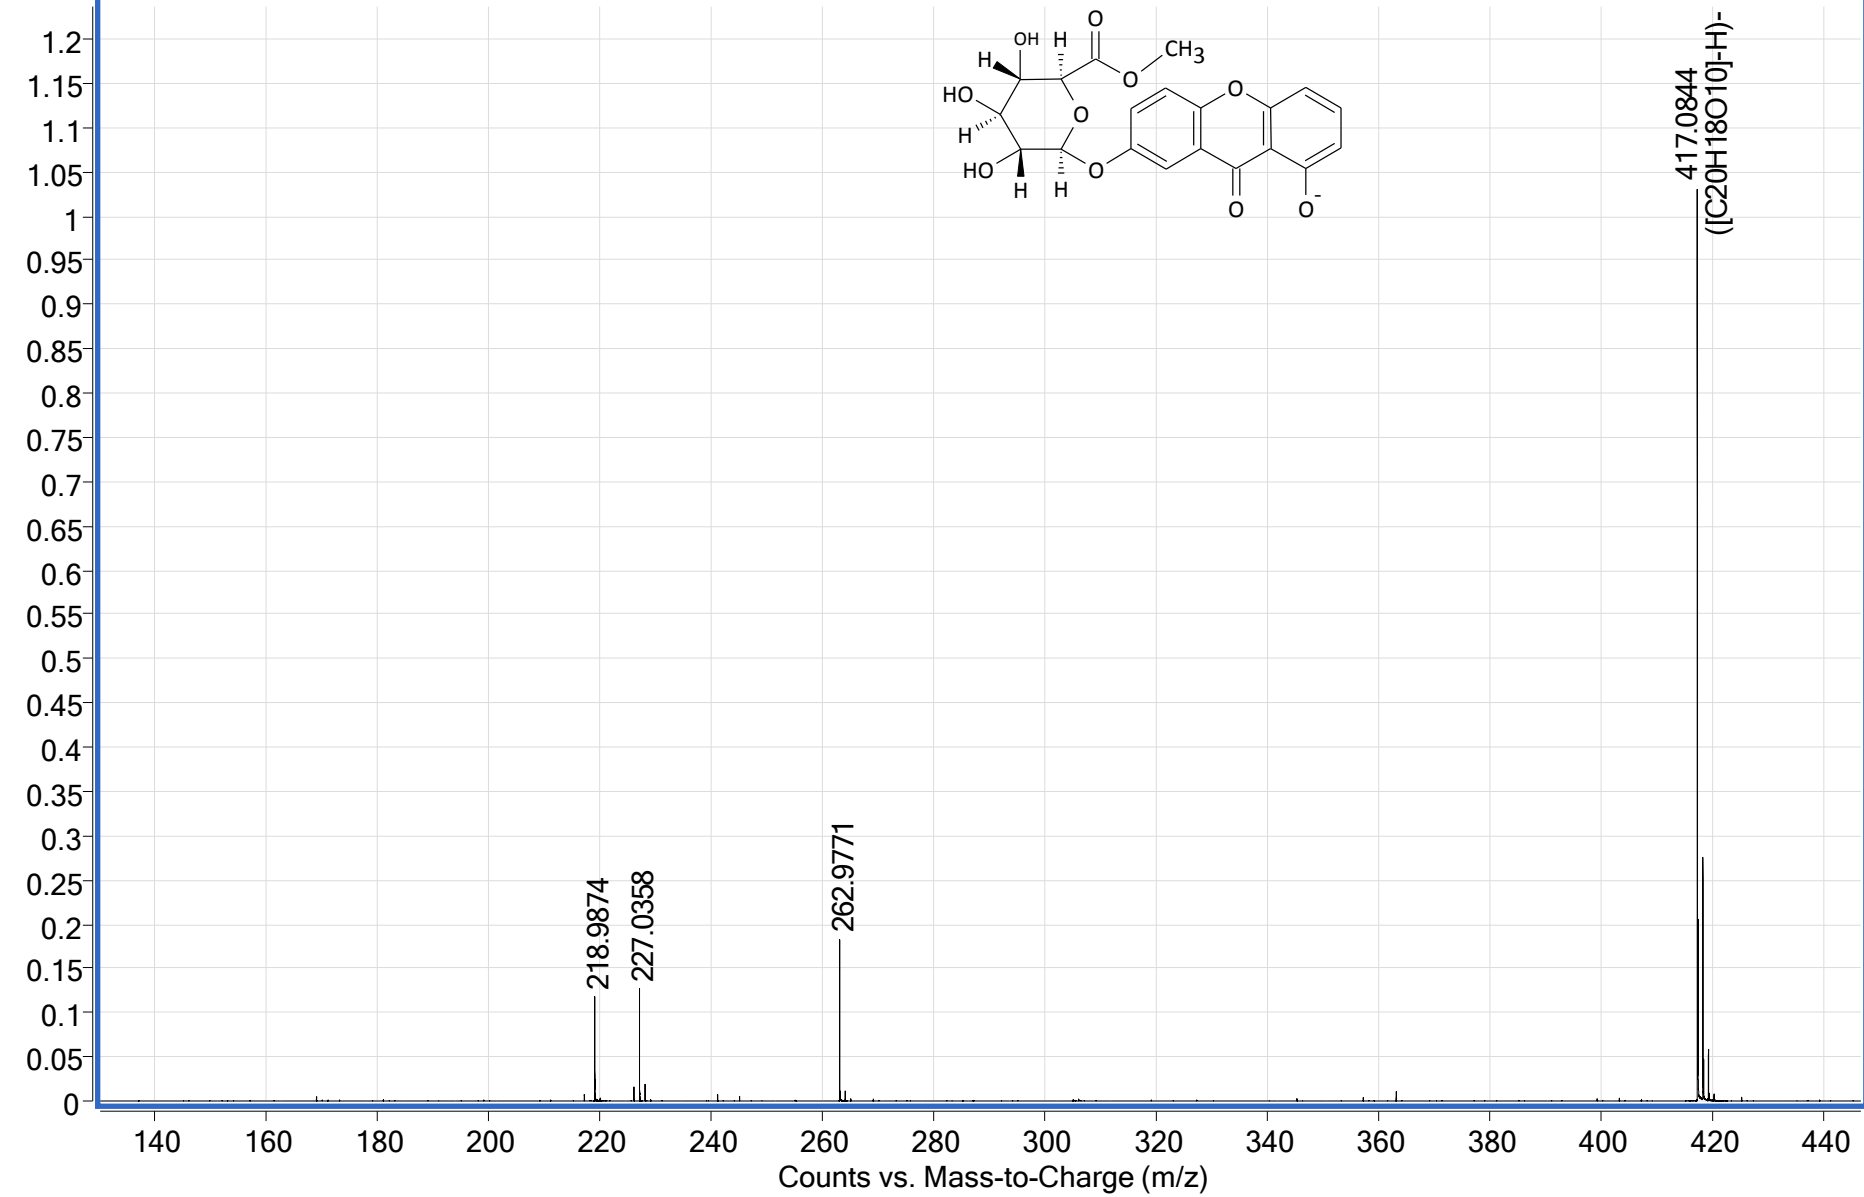

Supp.3. Mass spectra of methyl euxanthonate

-ESI Scan Frag=200.0V ) O-methylated methyl euxanthonate\_HCl extract

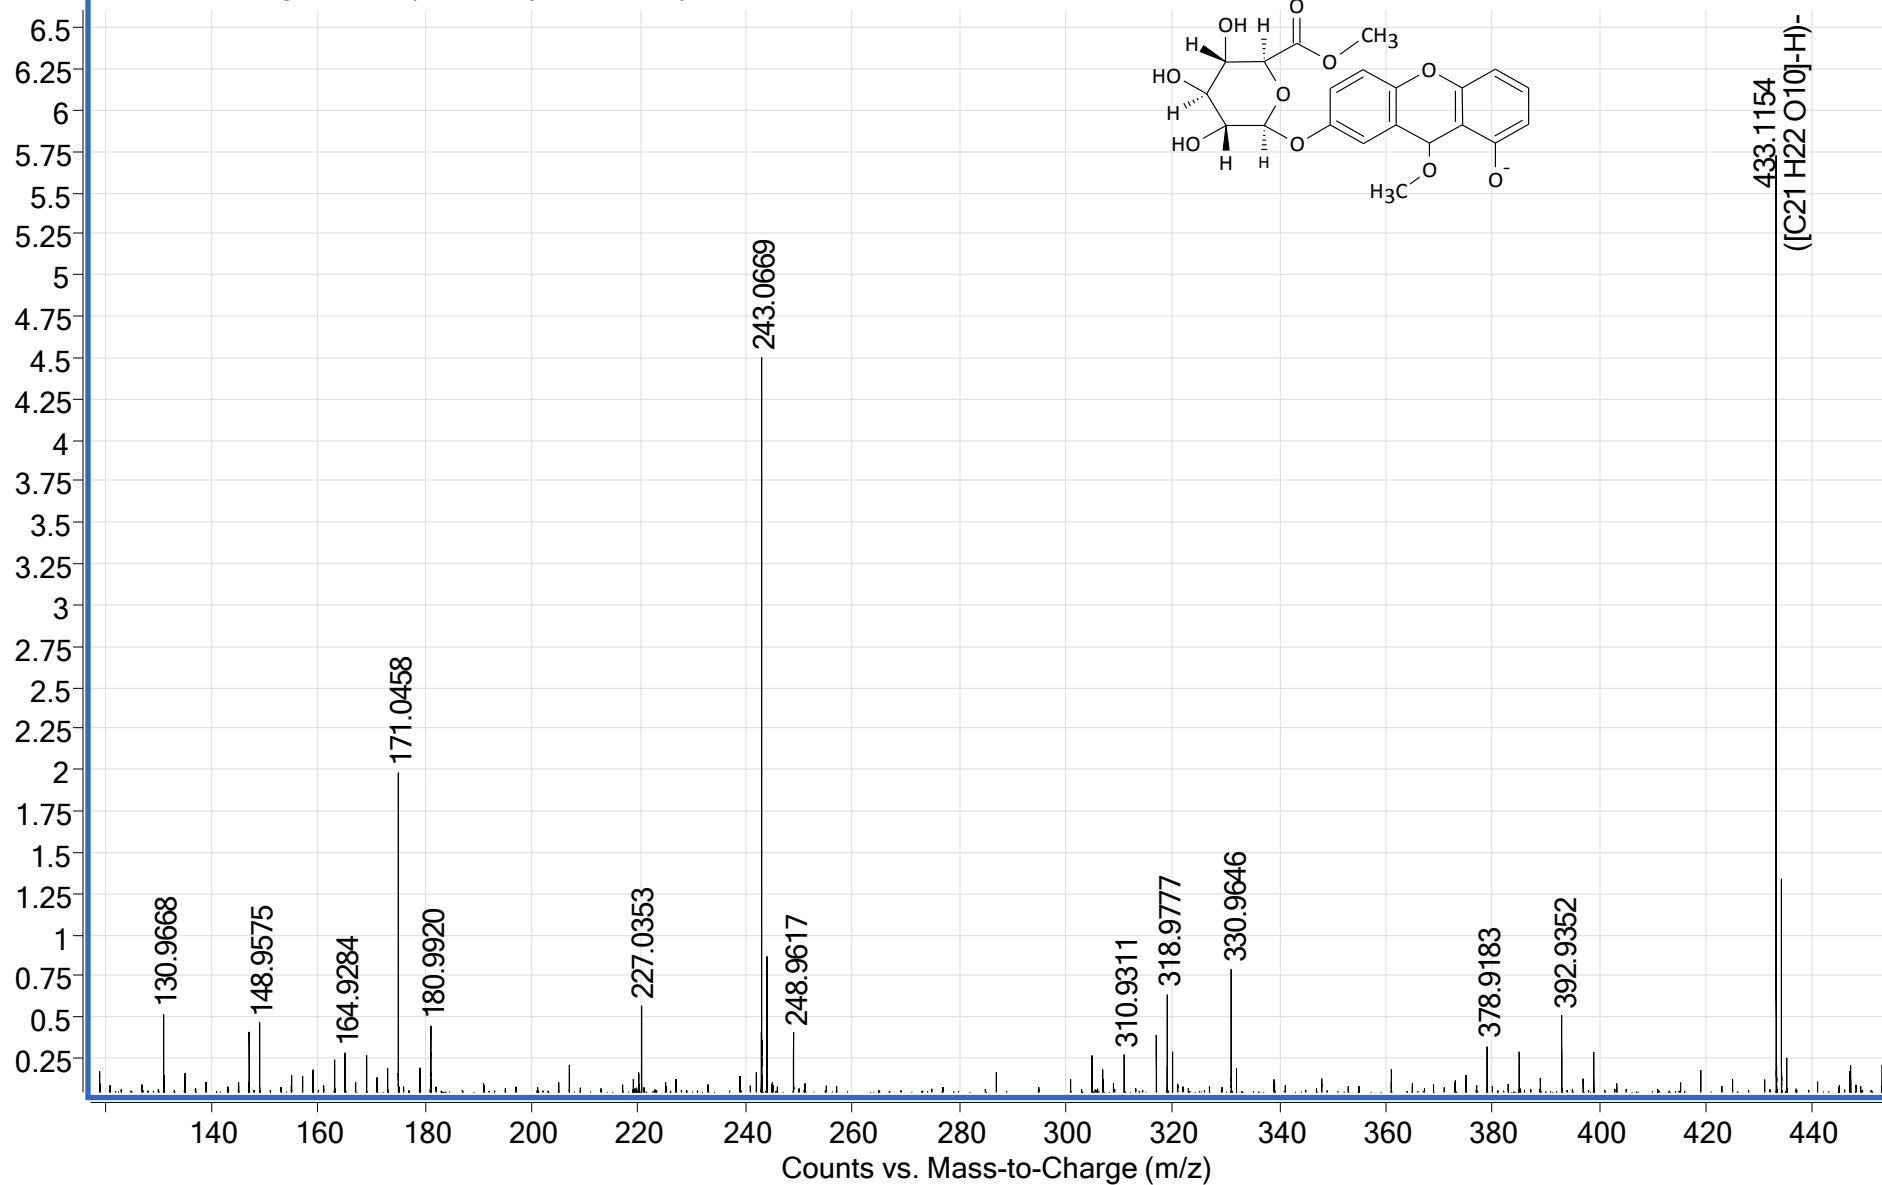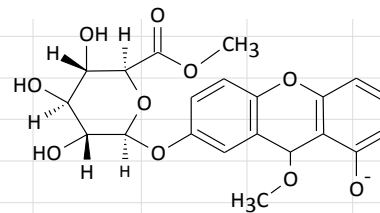

Supp.4. Mass spectra of O-methylated methyl euxanthonate

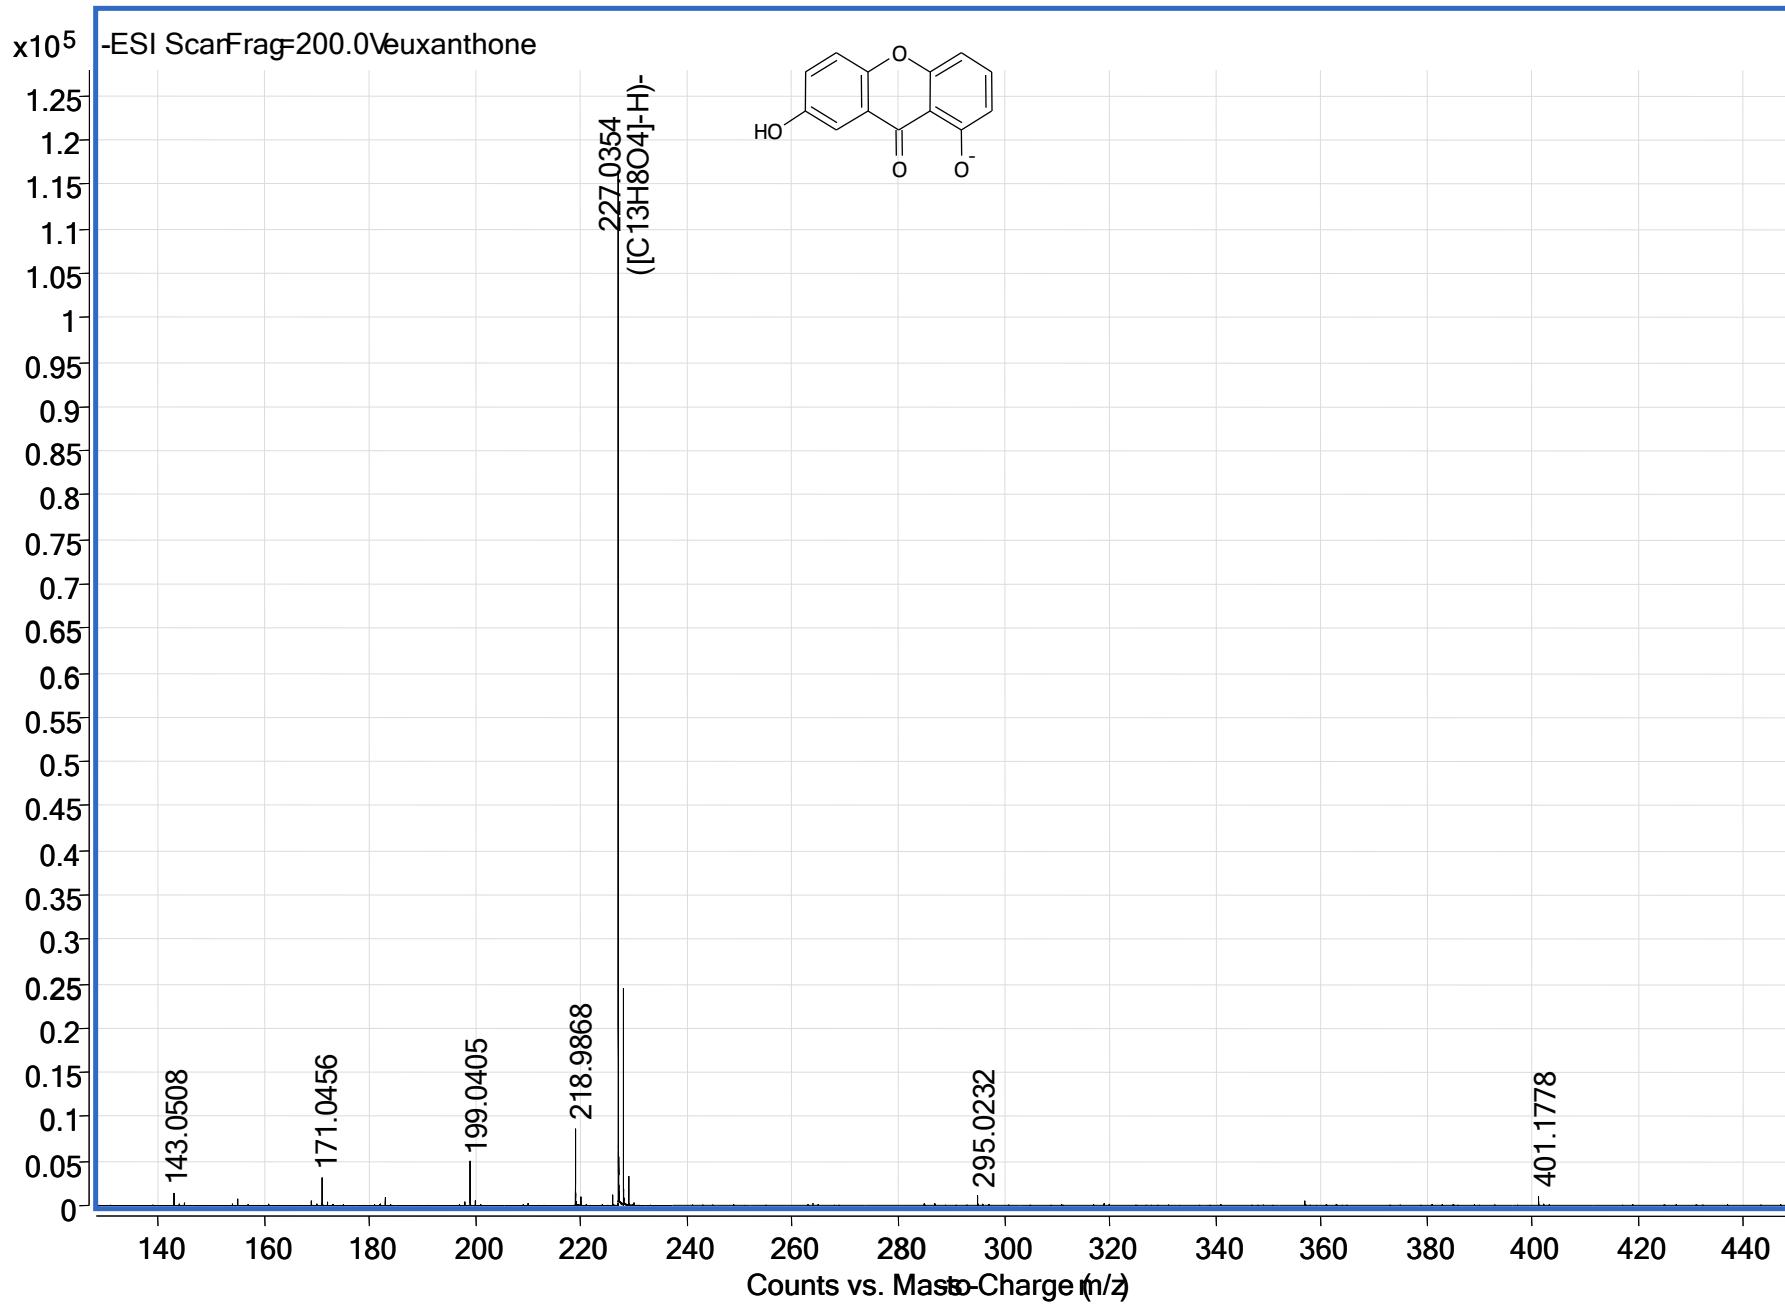

**Supp.5.** Mass spectra of euxanthone

-ESI Scan Frag=200.0V euanthone\_synthetic\_NMR

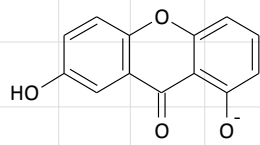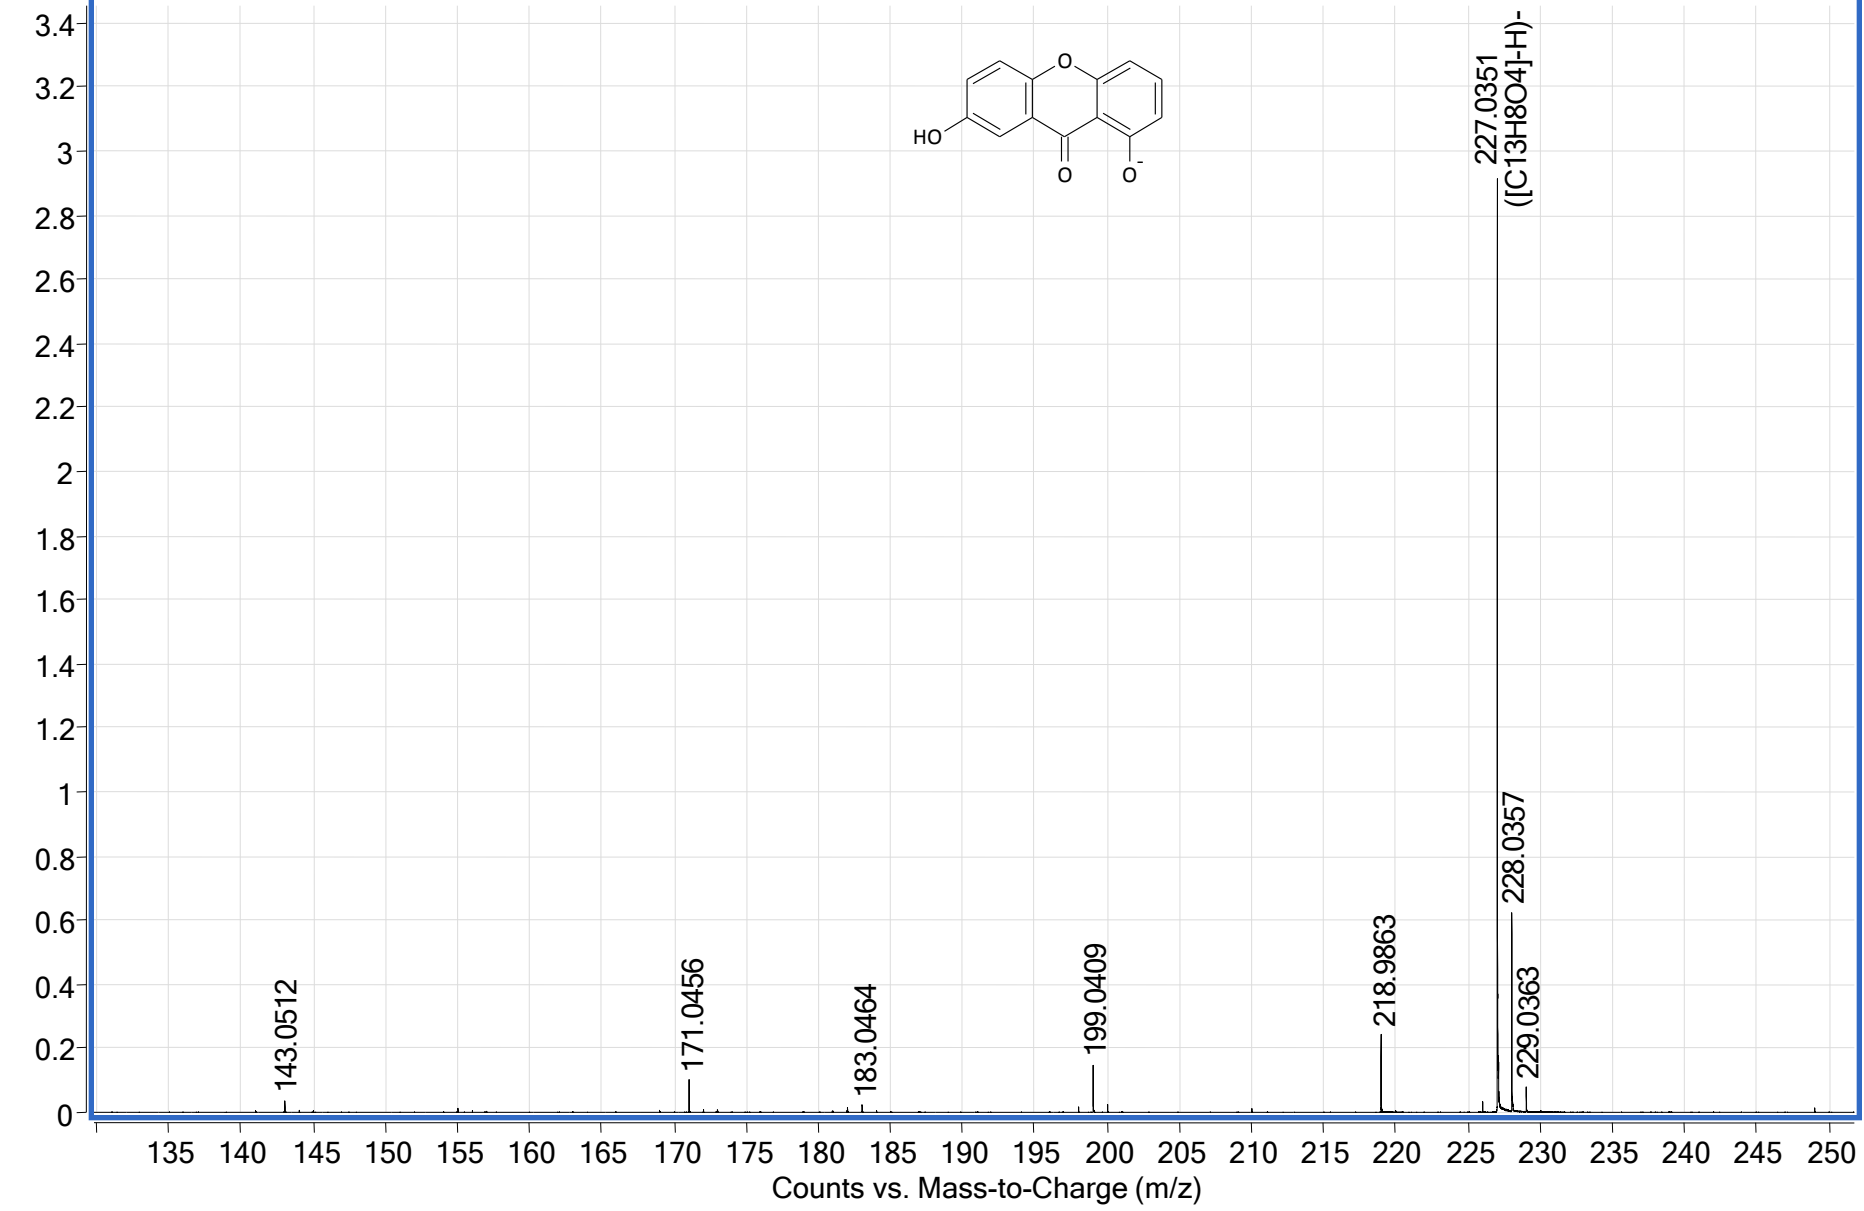

Supp.6. Mass spectra of synthetic euanthone

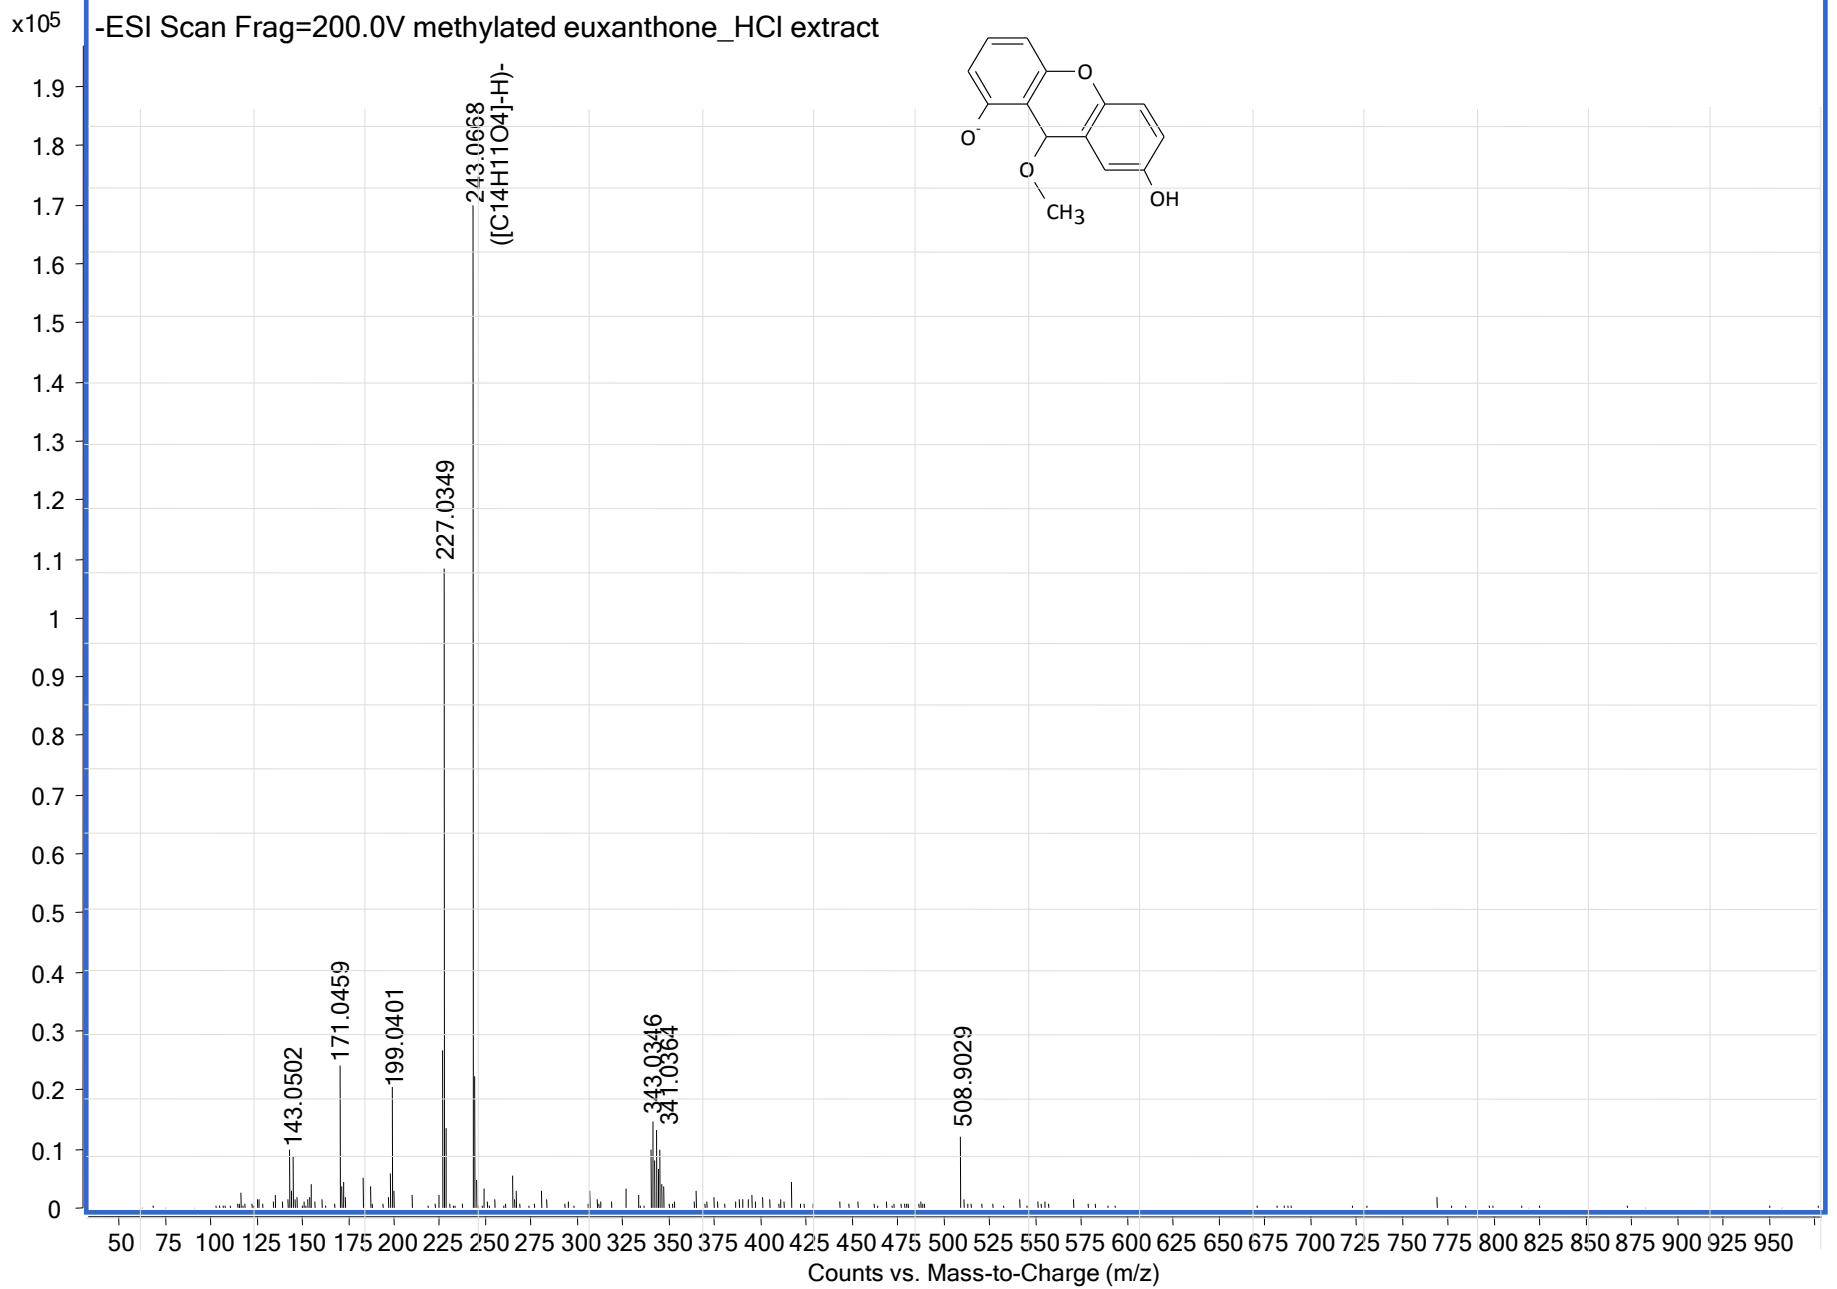

**Supp.7.** Mass spectra of methylated euxanthone

-ESI Scan Frag=200.0V trimethylated euxanthone\_HCl extract

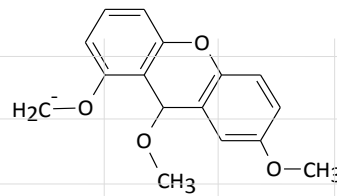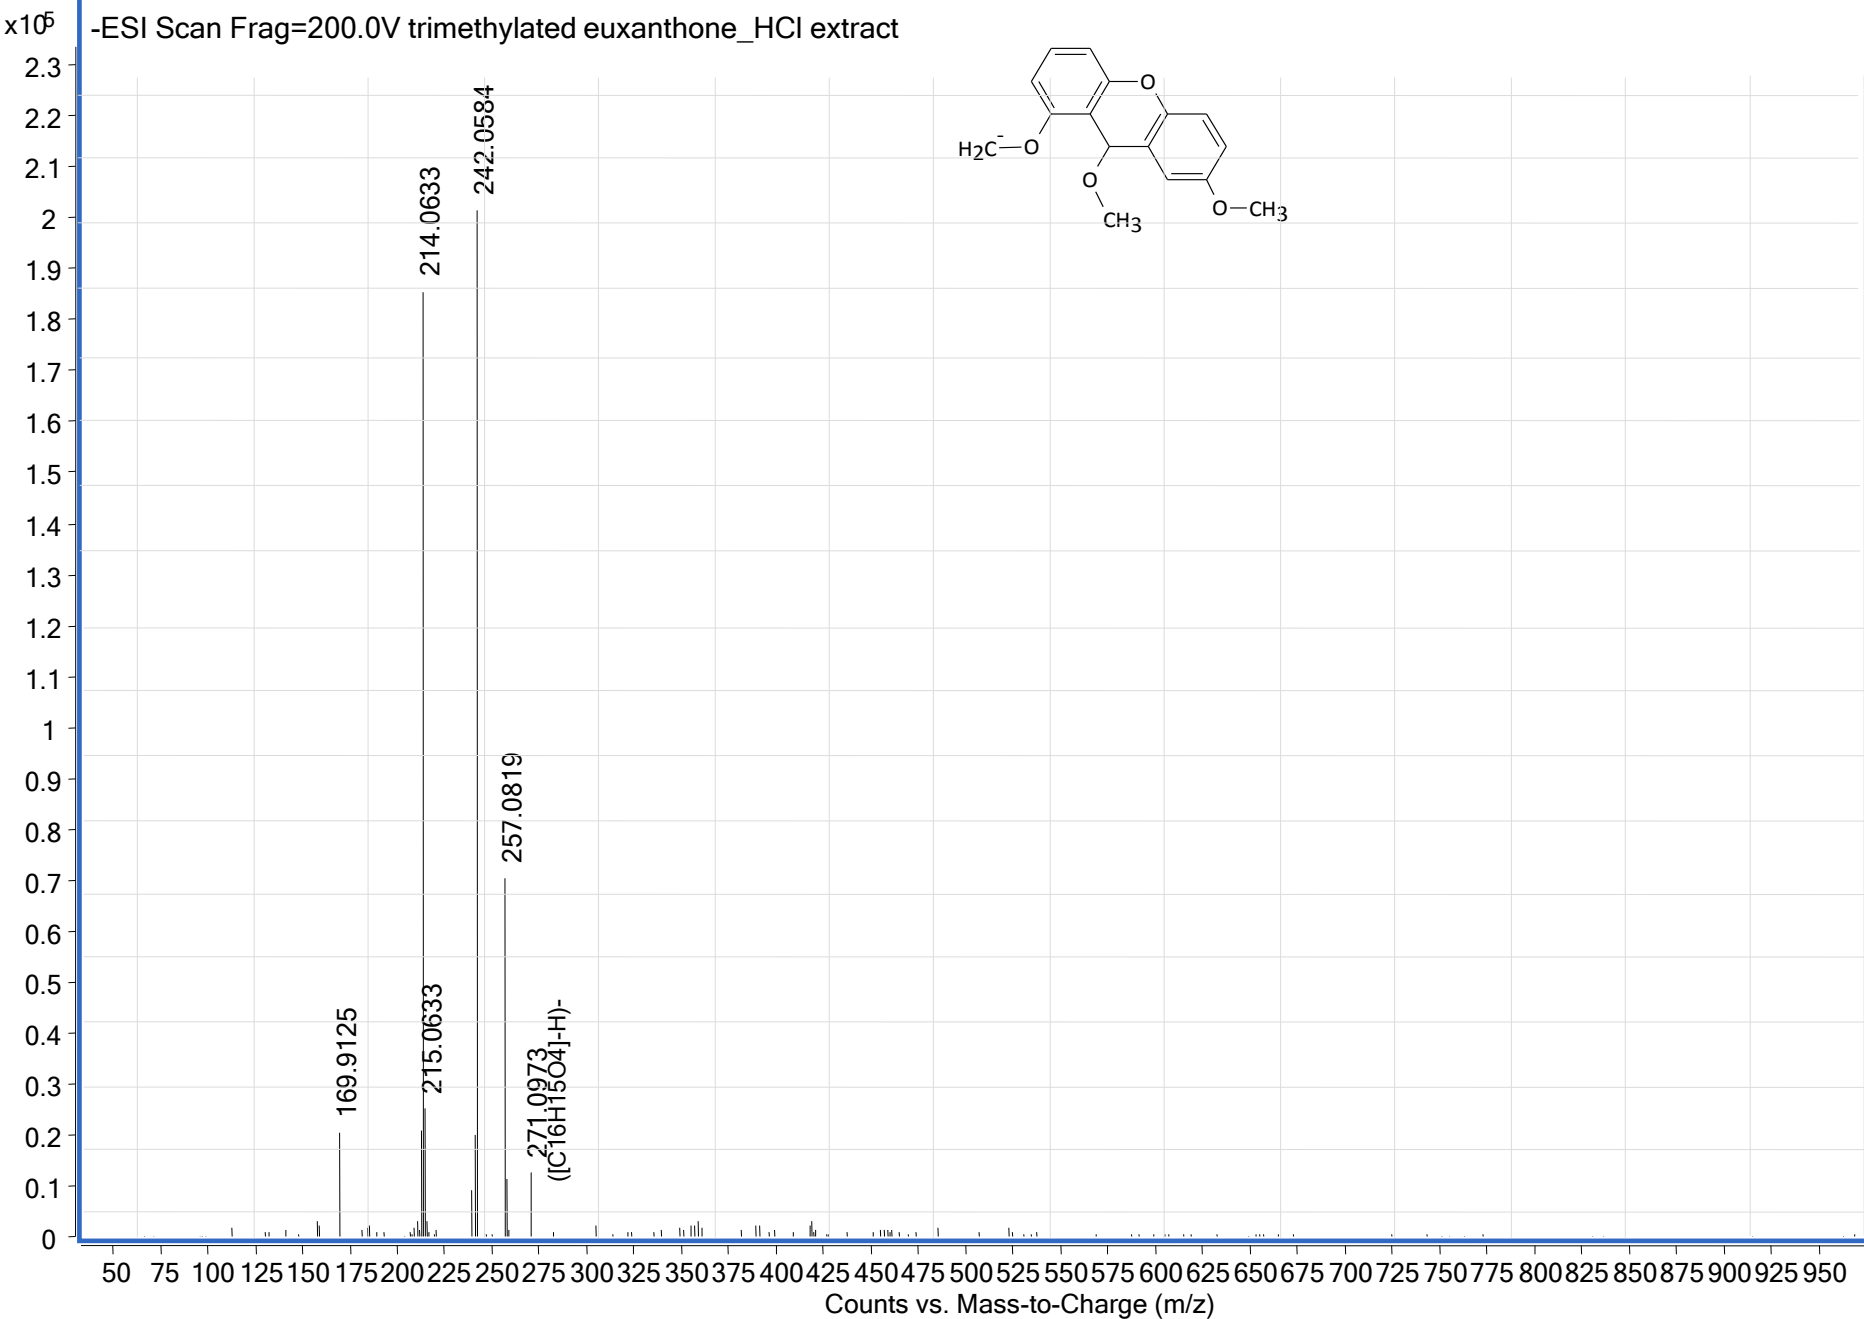

Supp. 8. Mass spectra of trimethylated euxanthone



a)

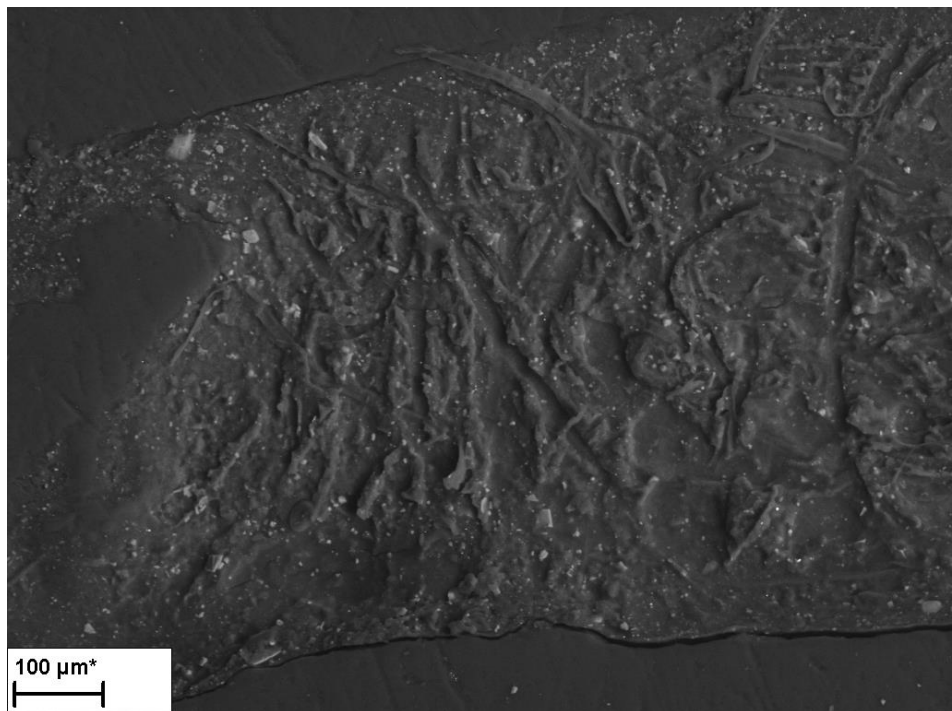

b)

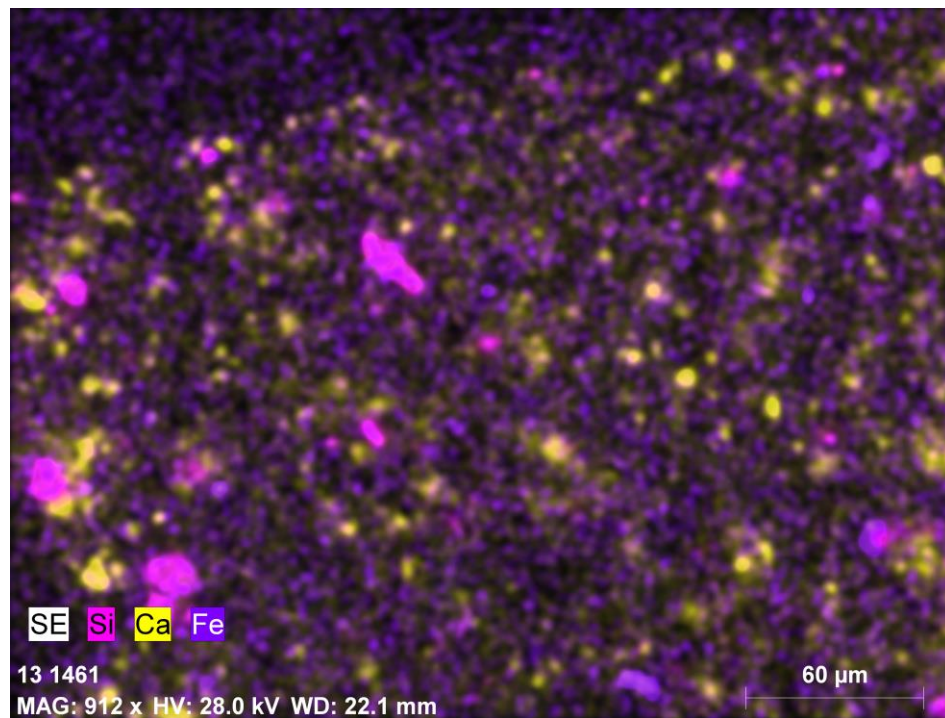

**Supp. 9.** SEM image of the Indian Yellow paint sample obtained using: a) backscattered electrons (BSE) detector, b) map of elemental distribution within the sample showing Fe, Si, Ca obtained with energy dispersive X-ray spectrometer (EDX); photography by . G. Trykowski
